# Supplementary figures and images for: Making heads or tails of mitochondrial membranes in longevity and aging: a role for comparative studies
Source: Springer Nature journal article supplement (doi:10.1186/2046-2395-3-3), 2014-03-03

**A**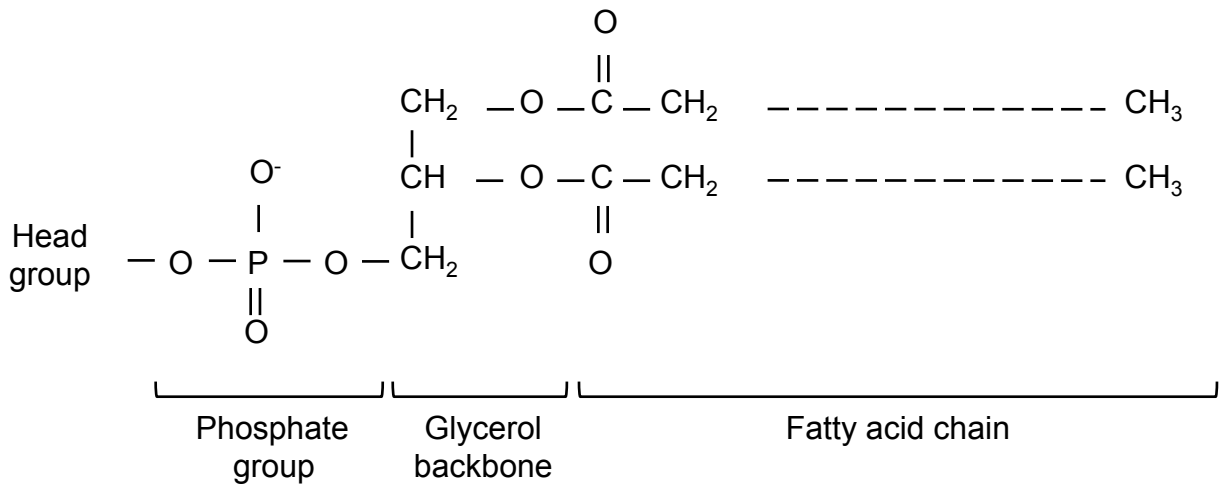**B**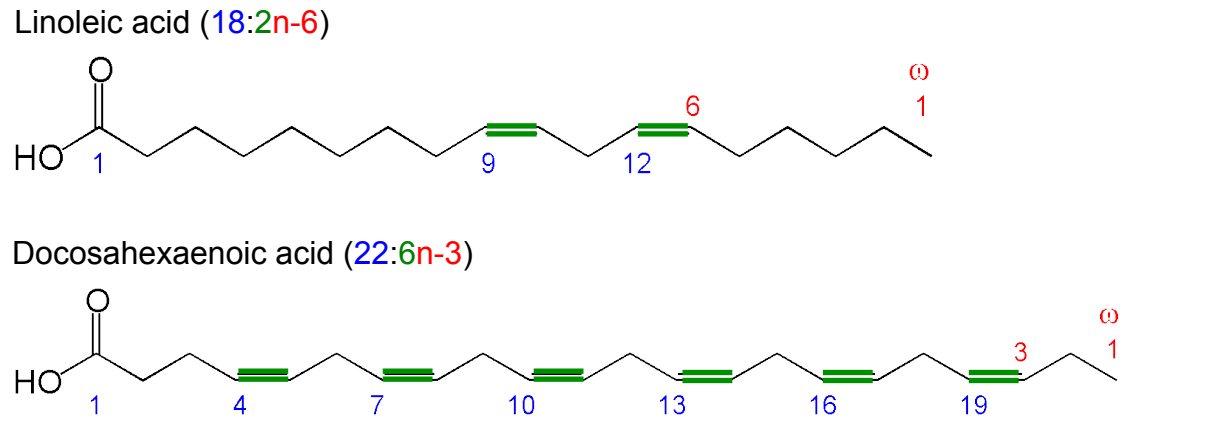

Supplement: 13685_2013_33_MOESM1_ESM.pdf [file 13685_2013_33_MOESM1_ESM.pdf]

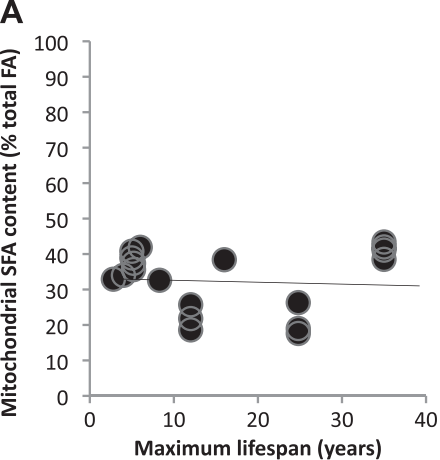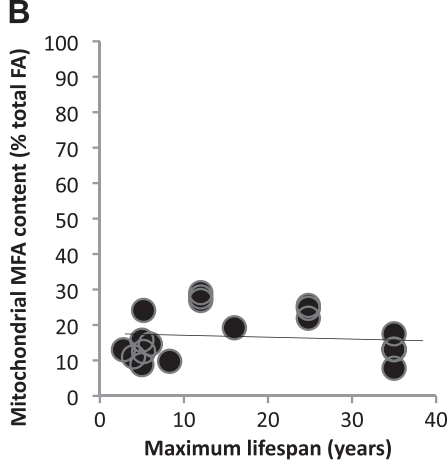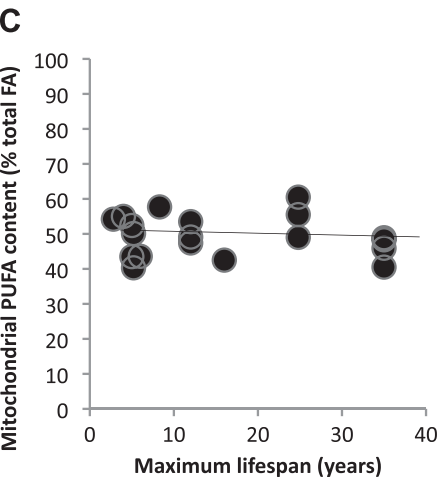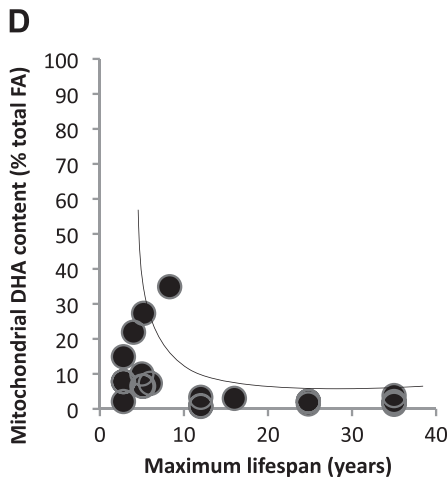

Supplement: 13685_2013_33_MOESM4_ESM.pdf [file 13685_2013_33_MOESM4_ESM.pdf]

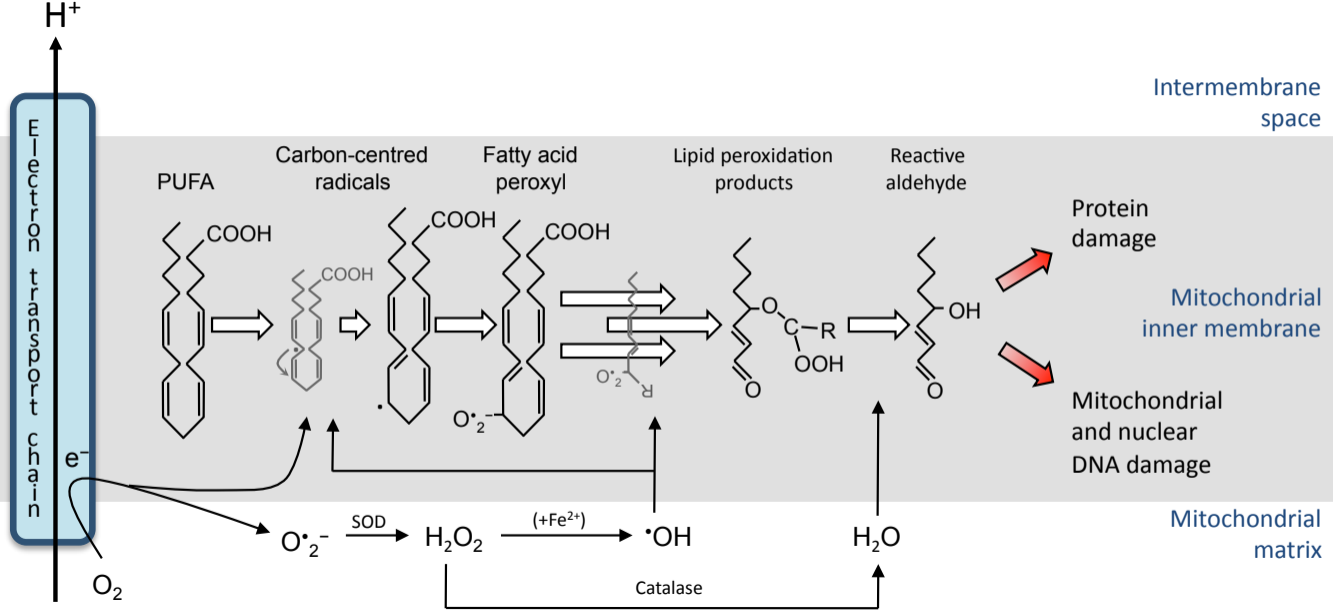

Supplement: 13685_2013_33_MOESM5_ESM.pdf [file 13685_2013_33_MOESM5_ESM.pdf]
